# Supplementary material for: Phase relations, thermal conductivity and elastic properties of ZrO2 and HfO2 polymorphs at high pressures and temperatures
Source: Royal Society of Chemistry journal article supplement (doi:10.1039/d3cp04690g), 2023-01-01
Supplement: d3cp04690g1.pdf [file d3cp04690g1.pdf]

## Supporting information

Phase relations, thermal conductivity and elastic properties of  
ZrO<sub>2</sub> and HfO<sub>2</sub> polymorphs at high pressures and temperatures

Dinara N. Sagatova <sup>\*1,2</sup>, Nursultan E. Sagatov<sup>2,3</sup>, Pavel N. Gavryushkin<sup>2,3</sup>, and Sergey F.  
Solodovnikov<sup>1</sup>

<sup>1</sup>*Nikolaev Institute of Inorganic Chemistry, Novosibirsk, Russian Federation*

<sup>2</sup>*Sobolev Institute of Geology and Mineralogy, Siberian Branch of the Russian Academy  
of Sciences, Novosibirsk, Russian Federation*

<sup>3</sup>*Novosibirsk State University, Novosibirsk, Russian Federation*

---

\*Electronic address:sagatovadn@igm.nsc.ru; Corresponding author

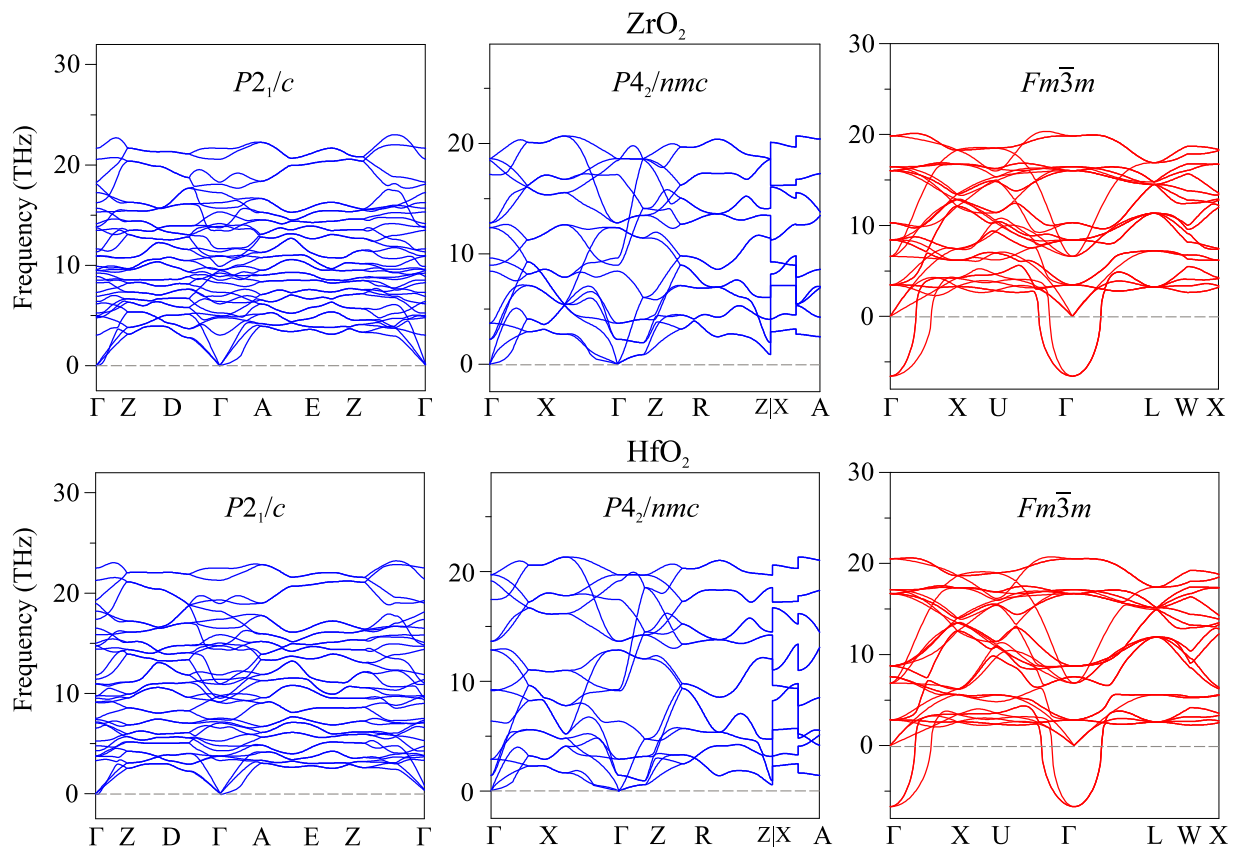

Figure S1: Phonon spectra of low-pressure modifications of  $\text{ZrO}_2$  and  $\text{HfO}_2$  at 0 GPa.

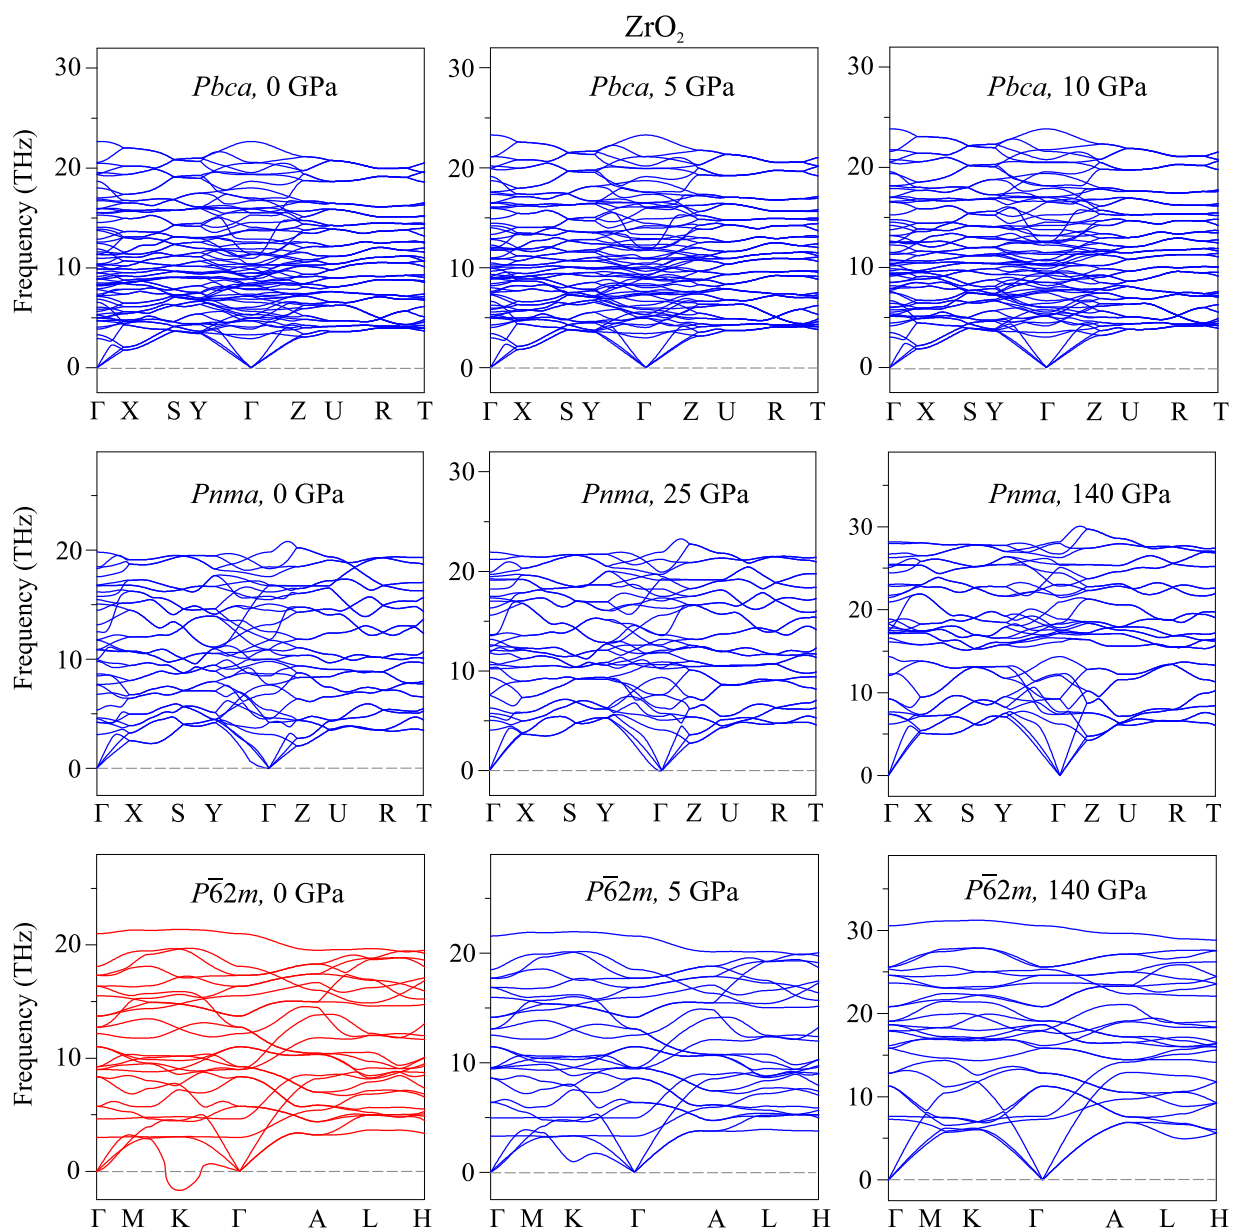

Figure S2: Phonon spectra of high-pressure modifications of  $\text{ZrO}_2$ .

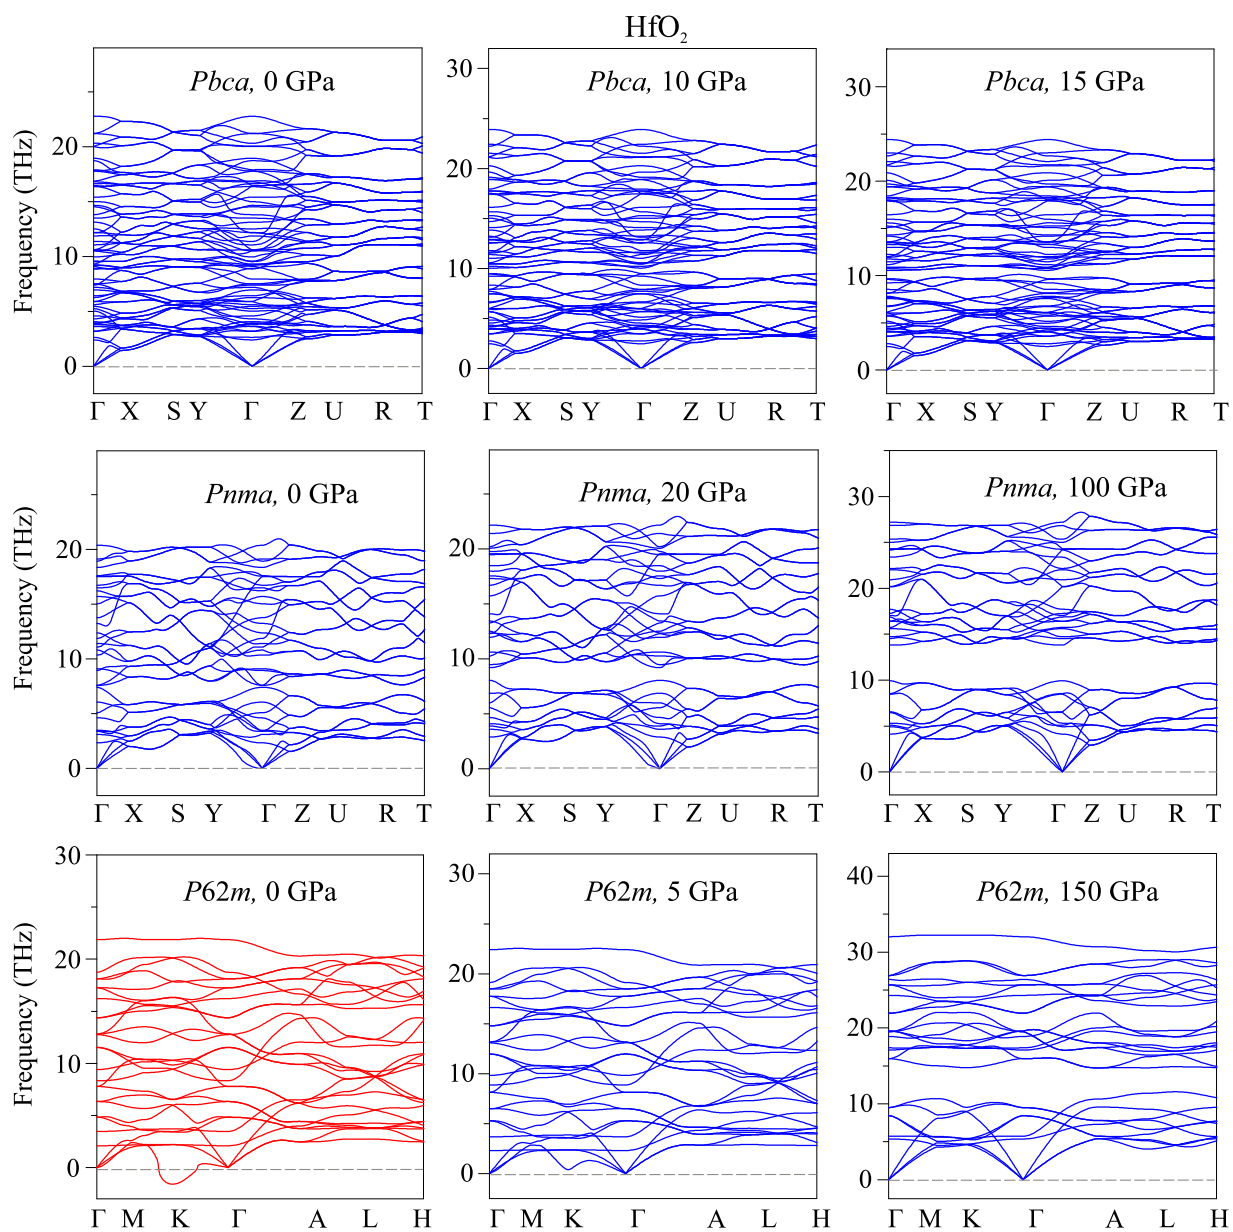

Figure S3: Phonon spectra of high-pressure modifications of  $\text{HfO}_2$ .

Table S1: Calculated bulk modulus (B), shear modulus (G), Poisson's ratio ( $\nu$ ), Young's modulus (E), the  $B/G$  ratio, and hardness ( $H_V$ ) of  $ZrO_2$  depended on pressure.

| $P$ (GPa) | $B$ (GPa) | $G$ (GPa) | $\nu$ | $E$ (GPa) | $B/G$ | $H_{Chen}^V$ (GPa) | $H_{Tian}^V$ (GPa) |
|-----------|-----------|-----------|-------|-----------|-------|--------------------|--------------------|
| 0         | 185       | 86        | 0.30  | 223       | 2.16  | 8.0                | 9.0                |
| 3         | 182       | 88        | 0.29  | 227       | 2.08  | 8.6                | 9.5                |
| 7         | 168       | 92        | 0.27  | 235       | 1.82  | 11.0               | 11.5               |
| 7         | 229       | 108       | 0.30  | 280       | 2.12  | 9.8                | 10.8               |
| 10        | 237       | 110       | 0.30  | 286       | 2.16  | 9.7                | 10.7               |
| 14        | 246       | 112       | 0.30  | 292       | 2.20  | 9.6                | 10.6               |
| 14        | 295       | 117       | 0.33  | 309       | 2.53  | 7.9                | 9.3                |
| 20        | 324       | 128       | 0.33  | 339       | 2.53  | 8.5                | 10.0               |
| 40        | 409       | 160       | 0.33  | 424       | 2.56  | 10.0               | 11.5               |
| 60        | 486       | 186       | 0.33  | 494       | 2.62  | 10.8               | 12.5               |
| 80        | 559       | 208       | 0.33  | 555       | 2.69  | 11.3               | 13.1               |
| 100       | 630       | 228       | 0.34  | 609       | 2.77  | 11.5               | 13.5               |
| 120       | 698       | 245       | 0.34  | 658       | 2.85  | 11.6               | 13.7               |
| 140       | 765       | 260       | 0.35  | 701       | 2.94  | 11.6               | 13.8               |
| 140       | 778       | 288       | 0.34  | 770       | 2.70  | 14.2               | 16.4               |
| 150       | 812       | 297       | 0.34  | 793       | 2.74  | 14.2               | 16.5               |
| 160       | 845       | 304       | 0.34  | 815       | 2.78  | 14.2               | 16.5               |

Table S2: Calculated bulk modulus (B), shear modulus (G), Poisson's ratio ( $\nu$ ), Young's modulus (E), the  $B/G$  ratio, and hardness ( $H_V$ ) of HfO<sub>2</sub> depended on pressure.

| $P$ (GPa) | $B$ (GPa) | $G$ (GPa) | $\nu$ | $E$ (GPa) | $B/G$ | $H_{Chen}^V$ (GPa) | $H_{Tian}^V$ (GPa) |
|-----------|-----------|-----------|-------|-----------|-------|--------------------|--------------------|
| 0         | 202       | 98        | 0.29  | 253       | 2.05  | 9.6                | 10.4               |
| 5         | 197       | 102       | 0.28  | 261       | 1.93  | 10.9               | 11.5               |
| 10        | 193       | 107       | 0.27  | 271       | 1.80  | 12.4               | 12.9               |
| 8         | 252       | 122       | 0.29  | 315       | 2.07  | 11.2               | 12.1               |
| 12        | 264       | 125       | 0.30  | 323       | 2.12  | 11.0               | 11.9               |
| 16        | 275       | 127       | 0.30  | 330       | 2.17  | 10.8               | 11.8               |
| 20        | 284       | 128       | 0.30  | 335       | 2.21  | 10.5               | 11.6               |
| 15        | 315       | 127       | 0.32  | 335       | 2.49  | 8.7                | 10.1               |
| 30        | 385       | 154       | 0.32  | 408       | 2.50  | 10.1               | 11.5               |
| 45        | 447       | 177       | 0.32  | 470       | 2.52  | 11.0               | 12.6               |
| 60        | 506       | 198       | 0.33  | 525       | 2.56  | 11.7               | 13.3               |
| 75        | 563       | 216       | 0.33  | 574       | 2.61  | 12.1               | 13.9               |
| 90        | 618       | 232       | 0.33  | 619       | 2.66  | 12.4               | 14.3               |
| 105       | 672       | 247       | 0.34  | 660       | 2.72  | 12.6               | 14.6               |
| 120       | 726       | 261       | 0.34  | 698       | 2.78  | 12.6               | 14.8               |
| 135       | 778       | 273       | 0.34  | 734       | 2.85  | 12.7               | 14.9               |
| 125       | 754       | 295       | 0.33  | 783       | 2.56  | 15.6               | 17.7               |
| 140       | 807       | 309       | 0.33  | 821       | 2.62  | 15.6               | 17.8               |
| 155       | 859       | 321       | 0.33  | 857       | 2.67  | 15.5               | 17.9               |

Table S3: Comparison of calculated lattice constants of  $\text{ZrO}_2\text{-}P2_1/c$  and  $\text{HfO}_2\text{-}P2_1/c$  with experimental data.

| $\text{ZrO}_2\text{-}P2_1/c$ , 0 GPa |        |       |        |                |       |       |
|--------------------------------------|--------|-------|--------|----------------|-------|-------|
| Parameter                            | Theory |       |        | Experiment [1] |       |       |
| $a$ (Å)                              | 5.191  |       |        | 5.147          |       |       |
| $b$ (Å)                              | 5.244  |       |        | 5.209          |       |       |
| $c$ (Å)                              | 5.379  |       |        | 5.317          |       |       |
| Atoms                                | $x$    | $y$   | $z$    | $x$            | $y$   | $z$   |
| Zr                                   | 0.275  | 0.543 | 0.710  | 0.275          | 0.040 | 0.209 |
| O1                                   | 0.065  | 0.827 | 0.849  | 0.069          | 0.332 | 0.344 |
| O2                                   | 0.451  | 0.256 | -0.024 | 0.450          | 0.756 | 0.478 |
| $\text{HfO}_2\text{-}P2_1/c$ , 0 GPa |        |       |        |                |       |       |
| Parameter                            | Theory |       |        | Experiment [2] |       |       |
| $a$ (Å)                              | 5.191  |       |        | 5.150          |       |       |
| $b$ (Å)                              | 5.244  |       |        | 5.185          |       |       |
| $c$ (Å)                              | 5.379  |       |        | 5.342          |       |       |
| Atoms                                | $x$    | $y$   | $z$    | $x$            | $y$   | $z$   |
| Hf1                                  | 0.275  | 0.543 | 0.710  | 0.280          | 0.049 | 0.217 |
| O1                                   | 0.065  | 0.827 | 0.849  | 0.069          | 0.326 | 0.343 |
| O2                                   | 0.451  | 0.256 | -0.024 | 0.460          | 0.749 | 0.489 |

Table S4: Comparison of calculated lattice constants of  $\text{ZrO}_2\text{-}P4_2/nmc$  and  $\text{HfO}_2\text{-}P4_2/nmc$  with experimental data.

| $\text{ZrO}_2\text{-}P4_2/nmc$ , 0 GPa |        |       |        |                |       |       |
|----------------------------------------|--------|-------|--------|----------------|-------|-------|
| Parameter                              | Theory |       |        | Experiment [3] |       |       |
| $a$ (Å)                                | 3.622  |       |        | 3.578          |       |       |
| $b$ (Å)                                | 3.622  |       |        | 3.578          |       |       |
| $c$ (Å)                                | 5.279  |       |        | 5.162          |       |       |
| Atoms                                  | $x$    | $y$   | $z$    | $x$            | $y$   | $z$   |
| Zr1                                    | 0.750  | 0.250 | 0.250  | 0.000          | 0.000 | 0.000 |
| O1                                     | 0.250  | 0.250 | -0.056 | 0.000          | 0.500 | 0.048 |
| $\text{HfO}_2\text{-}P4_2/nmc$ , 0 GPa |        |       |        |                |       |       |
| Parameter                              | Theory |       |        | Experiment [4] |       |       |
| $a$ (Å)                                | 3.594  |       |        | 3.593          |       |       |
| $b$ (Å)                                | 3.594  |       |        | 3.593          |       |       |
| $c$ (Å)                                | 5.229  |       |        | 5.225          |       |       |
| Atoms                                  | $x$    | $y$   | $z$    | $x$            | $y$   | $z$   |
| Hf1                                    | 0.750  | 0.250 | 0.250  | 0.000          | 0.000 | 0.000 |
| O1                                     | 0.250  | 0.250 | -0.054 | 0.000          | 0.500 | 0.195 |



Table S5: Comparison of calculated lattice constants of  $\text{ZrO}_2\text{-}Fm\bar{3}m$  and  $\text{HfO}_2\text{-}Fm\bar{3}m$  with experimental data.

| $\text{ZrO}_2\text{-}Fm\bar{3}m$ , 0 GPa |        |       |       |                |       |       |
|------------------------------------------|--------|-------|-------|----------------|-------|-------|
| Parameter                                | Theory |       |       | Experiment [5] |       |       |
| $a$ ( $\text{\AA}$ )                     | 5.118  |       |       | 5.090          |       |       |
| Atoms                                    | $x$    | $y$   | $z$   | $x$            | $y$   | $z$   |
| Zr1                                      | 0.000  | 0.000 | 0.000 | 0.000          | 0.000 | 0.000 |
| O1                                       | 0.250  | 0.250 | 0.250 | 0.250          | 0.250 | 0.250 |
| $\text{HfO}_2\text{-}Fm\bar{3}m$ , 0 GPa |        |       |       |                |       |       |
| Parameter                                | Theory |       |       | Experiment [6] |       |       |
| $a$ ( $\text{\AA}$ )                     | 5.080  |       |       | 5.115          |       |       |
| Atoms                                    | $x$    | $y$   | $z$   | $x$            | $y$   | $z$   |
| Hf1                                      | 0.000  | 0.000 | 0.000 | 0.000          | 0.000 | 0.000 |
| O1                                       | 0.250  | 0.250 | 0.250 | 0.250          | 0.250 | 0.250 |

Table S6: Comparison of calculated lattice constants of  $\text{ZrO}_2$ - $Pbca$  and  $\text{HfO}_2$ - $Pbca$  with experimental data.

| $\text{ZrO}_2$ - $Pbca$ , 0 GPa |        |       |       |                |       |       |
|---------------------------------|--------|-------|-------|----------------|-------|-------|
| Parameter                       | Theory |       |       | Experiment [7] |       |       |
| $a$ (Å)                         | 10.054 |       |       | 10.086         |       |       |
| $b$ (Å)                         | 5.261  |       |       | 5.261          |       |       |
| $c$ (Å)                         | 5.078  |       |       | 5.091          |       |       |
| Atoms                           | $x$    | $y$   | $z$   | $x$            | $y$   | $z$   |
| Zr1                             | 0.884  | 0.034 | 0.253 | 0.884          | 0.032 | 0.256 |
| O1                              | 0.791  | 0.377 | 0.131 | 0.791          | 0.371 | 0.131 |
| O2                              | -0.023 | 0.738 | 0.497 | 0.978          | 0.748 | 0.495 |
| $\text{HfO}_2$ - $Pbca$ , 0 GPa |        |       |       |                |       |       |
| Parameter                       | Theory |       |       | Experiment [8] |       |       |
| $a$ (Å)                         | 10.068 |       |       | 10.017         |       |       |
| $b$ (Å)                         | 5.252  |       |       | 5.228          |       |       |
| $c$ (Å)                         | 5.089  |       |       | 5.060          |       |       |
| Atoms                           | $x$    | $y$   | $z$   | $x$            | $y$   | $z$   |
| Hf1                             | 0.884  | 0.036 | 0.254 | 0.884          | 0.034 | 0.253 |
| O1                              | 0.789  | 0.372 | 0.124 | 0.796          | 0.380 | 0.138 |
| O2                              | -0.022 | 0.739 | 0.498 | 0.977          | 0.750 | 0.490 |

Table S7: Comparison of calculated lattice constants of  $\text{ZrO}_2\text{-}Pnma$  and  $\text{HfO}_2\text{-}Pnma$  with experimental data.

| $\text{ZrO}_2\text{-}Pnma, 0 \text{ GPa}$ |        |       |        |                |       |       |
|-------------------------------------------|--------|-------|--------|----------------|-------|-------|
| Parameter                                 | Theory |       |        | Experiment [9] |       |       |
| $a$ (Å)                                   | 5.601  |       |        | 5.587          |       |       |
| $b$ (Å)                                   | 3.375  |       |        | 6.485          |       |       |
| $c$ (Å)                                   | 6.550  |       |        | 3.330          |       |       |
| Atoms                                     | $x$    | $y$   | $z$    | $x$            | $y$   | $z$   |
| Zr1                                       | 0.249  | 0.250 | 0.107  | 0.246          | 0.111 | 0.250 |
| O1                                        | 0.361  | 0.250 | 0.423  | 0.360          | 0.425 | 0.250 |
| O2                                        | -0.021 | 0.250 | 0.658  | 0.025          | 0.339 | 0.750 |
| $\text{HfO}_2\text{-}Pnma, 0 \text{ GPa}$ |        |       |        |                |       |       |
| Parameter                                 | Theory |       |        | Experiment [9] |       |       |
| $a$ (Å)                                   | 5.560  |       |        | 5.554          |       |       |
| $b$ (Å)                                   | 3.335  |       |        | 6.457          |       |       |
| $c$ (Å)                                   | 6.514  |       |        | 3.307          |       |       |
| Atoms                                     | $x$    | $y$   | $z$    | $x$            | $y$   | $z$   |
| Hf1                                       | 0.751  | 0.250 | 0.892  | 0.246          | 0.110 | 0.250 |
| O1                                        | 0.020  | 0.250 | 0.341  | 0.359          | 0.426 | 0.250 |
| O2                                        | 0.139  | 0.250 | -0.077 | 0.024          | 0.339 | 0.750 |

Table S8: Comparison of calculated lattice constants of  $\text{ZrO}_2$ - $P\bar{6}2m$  and  $\text{HfO}_2$ - $P\bar{6}2m$  with experimental data.

| $\text{ZrO}_2$ - $P\bar{6}2m$ , 150 GPa |                  |                           |
|-----------------------------------------|------------------|---------------------------|
| Parameter                               | Theory           | Experiment [10]           |
| $a$ (Å)                                 | 5.139            | 5.134                     |
| $b$ (Å)                                 | 5.139            | 5.134                     |
| $c$ (Å)                                 | 2.951            | 2.950                     |
| $\text{HfO}_2$ - $P\bar{6}2m$           |                  |                           |
| Parameter                               | Theory (150 GPa) | Experiment (177 GPa) [11] |
| $a$ (Å)                                 | 5.131            | 5.074                     |
| $b$ (Å)                                 | 5.131            | 5.074                     |
| $c$ (Å)                                 | 2.925            | 2.899                     |

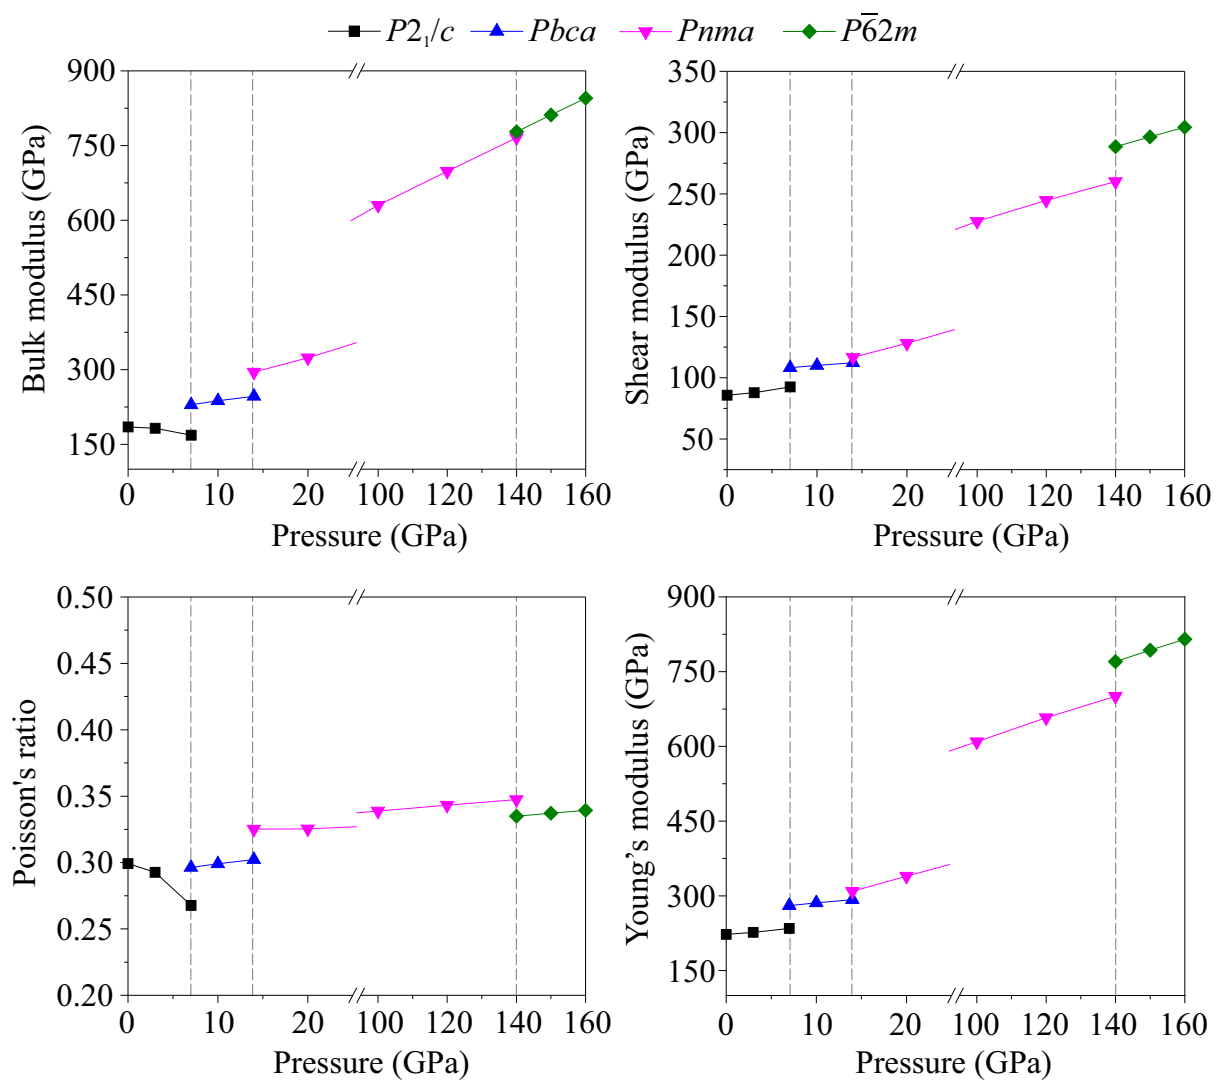

Figure S4: Pressure-dependence of  $B$ ,  $G$ ,  $\nu$ , and  $E$  for ZrO<sub>2</sub> polymorphs.

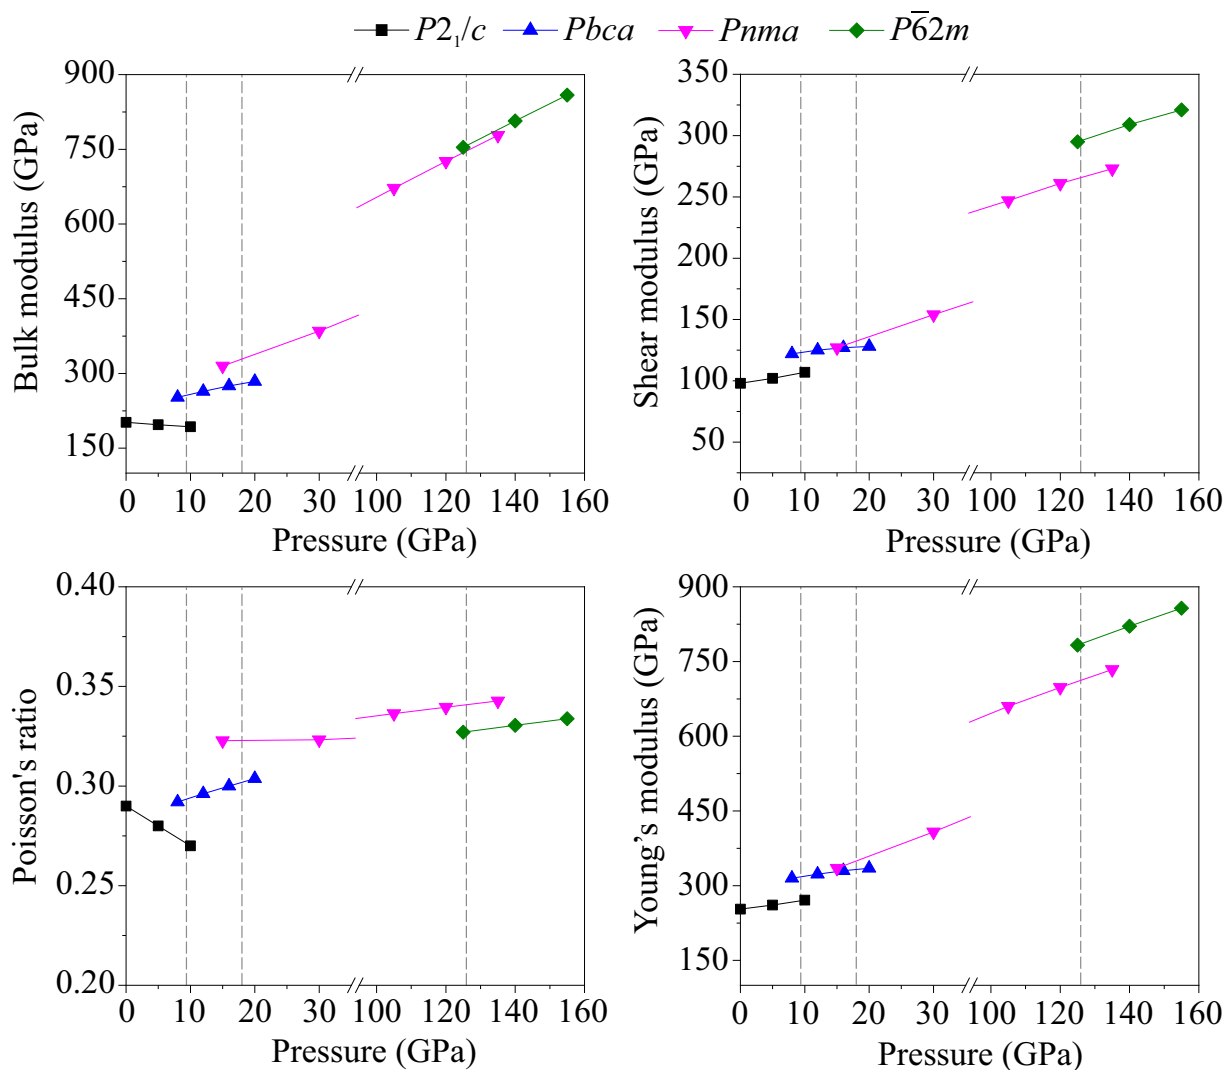

Figure S5: Pressure-dependence of  $B$ ,  $G$ ,  $\nu$ , and  $E$  for HfO<sub>2</sub> polymorphs.

## References

- [1] H. Fukui, M. Fujimoto, Y. Akahama, A. Sano-Furukawa, T. Hattori, Structure change of monoclinic ZrO<sub>2</sub> baddeleyite involving softenings of bulk modulus and atom vibrations, *Acta Crystallographica Section B: Structural Science, Crystal Engineering and Materials* 75 (4) (2019) 742–749.
- [2] S. J. Henderson, O. Shebanova, A. L. Hector, P. F. McMillan, M. T. Weller, Structural variations in pyrochlore-structured Bi<sub>2</sub>Hf<sub>2</sub>O<sub>7</sub>, Bi<sub>2</sub>Ti<sub>2</sub>O<sub>7</sub> and Bi<sub>2</sub>Hf<sub>2-x</sub>Ti<sub>x</sub>O<sub>7</sub> solid solutions as a function of

- composition and temperature by neutron and X-ray diffraction and raman spectroscopy, *Chemistry of Materials* 19 (7) (2007) 1712–1722.
- [3] P. Bouvier, E. Djurado, C. Ritter, A. Dianoux, G. Lucazeau, Low temperature phase transformation of nanocrystalline tetragonal  $\text{ZrO}_2$  by neutron and raman scattering studies, *International Journal of Inorganic Materials* 3 (7) (2001) 647–654.
- [4] A. Jain, S. P. Ong, G. Hautier, W. Chen, W. D. Richards, S. Dacek, S. Cholia, D. Gunter, D. Skinner, G. Ceder, K. a. Persson, The Materials Project: A materials genome approach to accelerating materials innovation, *APL Materials* 1 (1) (2013) 011002.
- [5] G. Katz, X-ray diffraction powder pattern of metastable cubic  $\text{ZrO}_2$ , *Journal of the American Ceramic Society* 54 (10) (1971) 531–531.
- [6] R. W. G. Wyckoff, R. W. Wyckoff, *Crystal structures*, Vol. 1, Interscience publishers New York, 1963.
- [7] O. Ohtaka, T. Yamanaka, S. Kume, N. Hara, H. Asano, F. Izumi, Structural analysis of orthorhombic  $\text{ZrO}_2$  by high resolution neutron powder diffraction, *Proceedings of the Japan Academy, Series B* 66 (10) (1990) 193–196.
- [8] O. OHTAKA, T. YAMANAKA, S. KUME, Synthesis and X-ray structural analysis by the Rietveld method of orthorhombic hafnia, *Journal of the Ceramic Society of Japan* 99 (1153) (1991) 826–827.
- [9] J. Haines, J. M. Léger, S. Hull, J. P. Petitet, A. S. Pereira, C. A. Perottoni, J. A. da Jornada, Characterization of the cotunnite-type phases of zirconia and hafnia by neutron diffraction and Raman spectroscopy, *Journal of the American Ceramic Society* 80 (7) (1997) 1910–1914.
- [10] D. Nishio-Hamane, H. Dekura, Y. Seto, T. Yagi, Theoretical and experimental evidence for the post-cotunnite phase transition in zirconia at high pressure, *Physics and Chemistry of Minerals* 42 (2015) 385–392.
- [11] R. Dutta, B. Kiefer, E. Greenberg, V. B. Prakapenka, T. S. Duffy, Ultrahigh-pressure behavior of  $\text{AO}_2$  (A= Sn, Pb, Hf) compounds, *The Journal of Physical Chemistry C* 123 (45) (2019) 27735–27741.
